# Supplementary material for: Spent Coffee Waste as a Potential Media Component for Xylanase Production and Potential Application in Juice Enrichment
Source: MDPI journal article supplement (doi:10.3390/foods8110585), 2019-11-17
Supplement: s1 [file s1]

## Supplementary Data

*Article*

# Spent Coffee Waste as a Potential Media Component for Xylanase Production and Potential Application in Juice Enrichment

Rajeev Ravindran <sup>1,2</sup>, Gwilym A. Williams <sup>2</sup> and Amit K. Jaiswal <sup>1,\*</sup>

<sup>1</sup> School of Food Science and Environmental Health, College of Sciences and Health, Dublin Institute of Technology, Cathal Brugha Street, Dublin D01 HV58, Ireland; rajeev.ravindran@mydit.ie

<sup>2</sup> School of Biological Sciences, College of Sciences and Health, Dublin Institute of Technology, Kevin Street, D08 NF82 Dublin, Ireland; gwilym.williams@TUDublin.ie

\* Correspondence: email: amit.jaiswal@TUDublin.ie; akjaiswal@outlook.com; Tel: +353-1402-4547

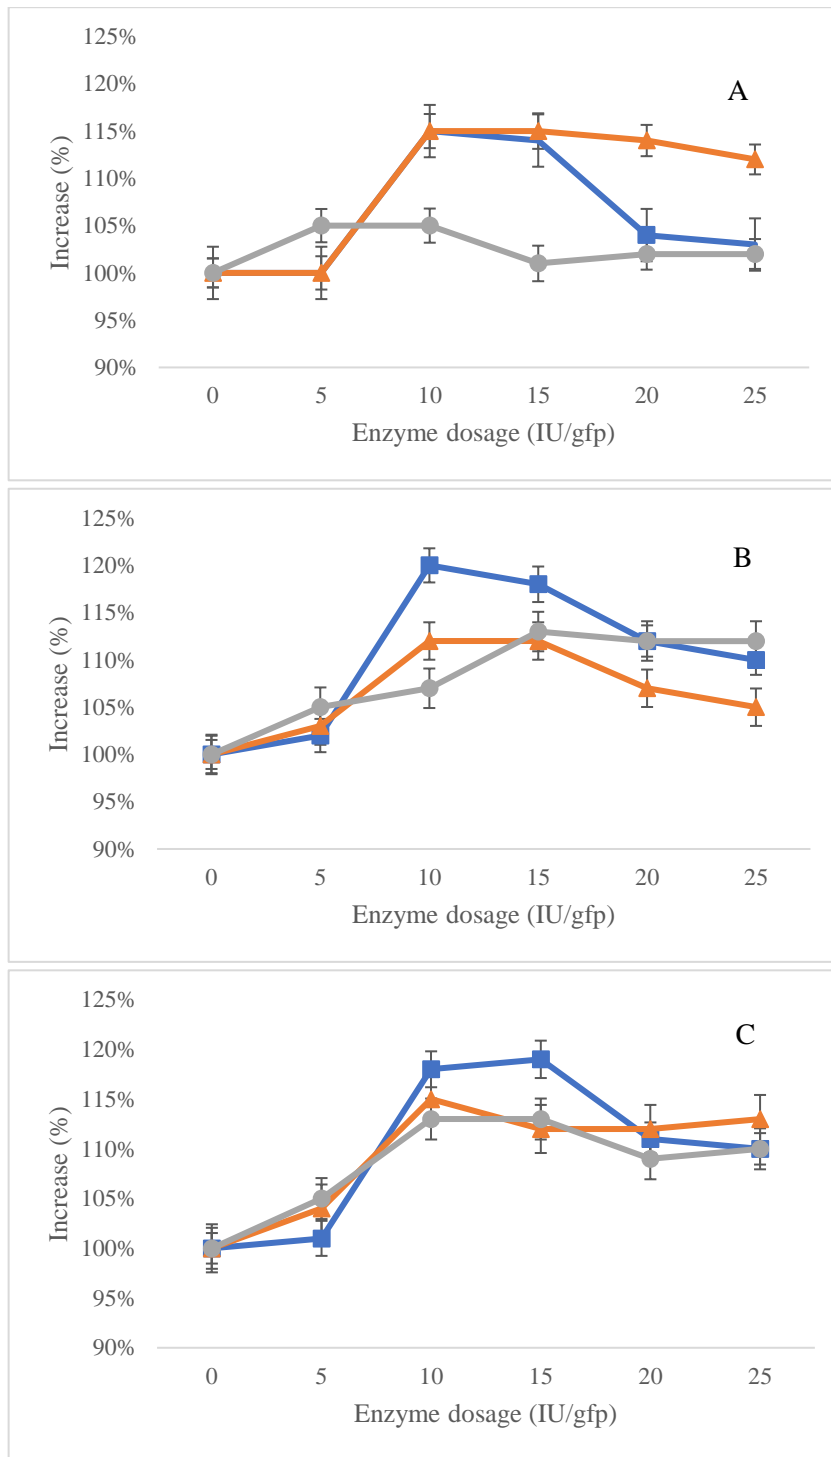

Figure S1. Effect of enzyme dosage on juice enrichment with respect to reducing sugar content (■) clarity (▲) and yield (●) (A) of strawberry, (B) blueberry and (C) raspberry

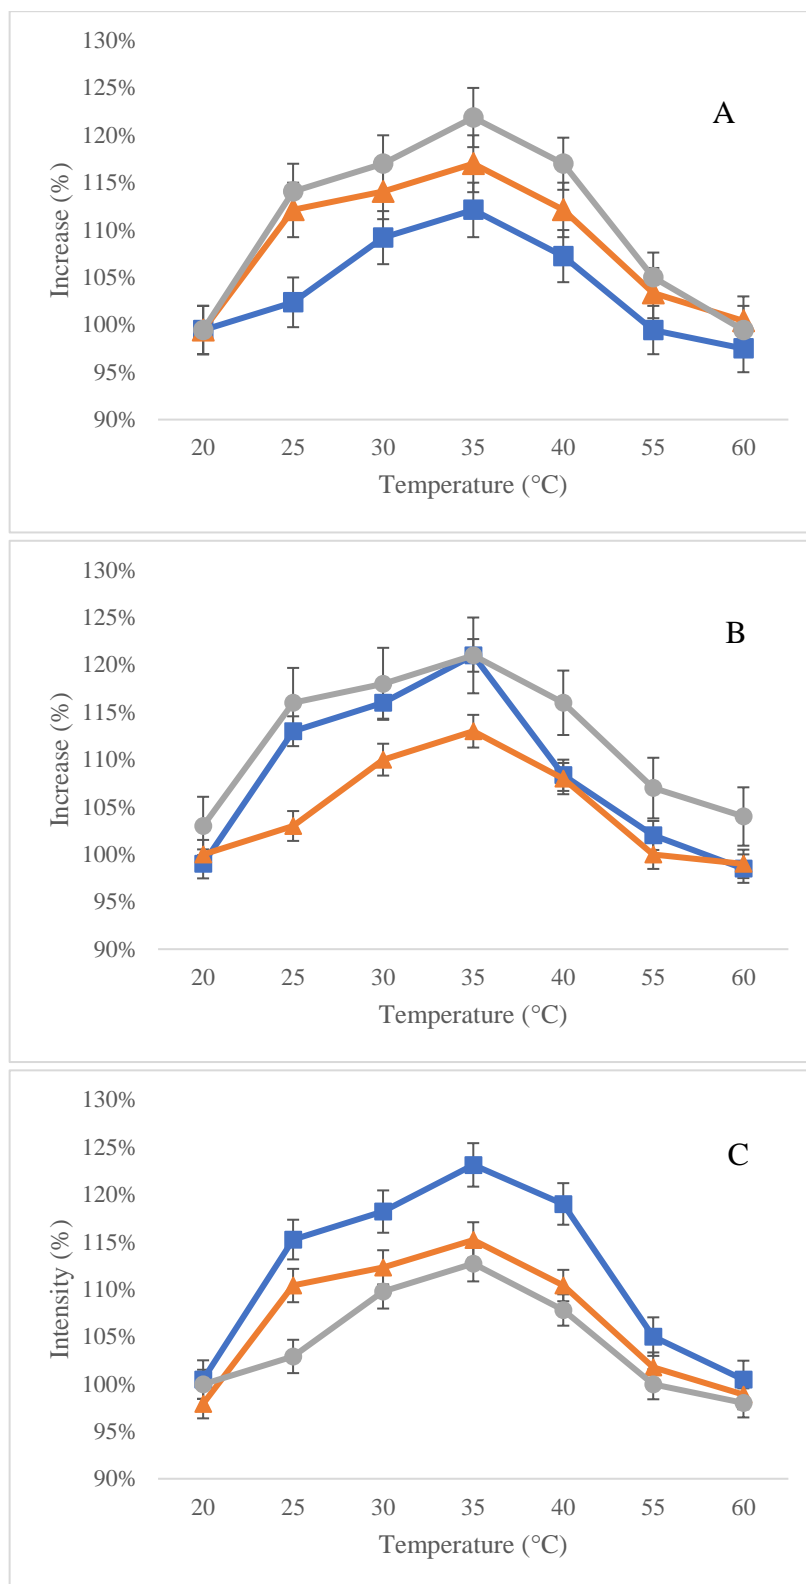

Figure S2. Effect of temperature on juice enrichment with respect to reducing sugar content (■) clarity (▲) and yield (●) of (a) strawberry (b) blueberry and (c) raspberry

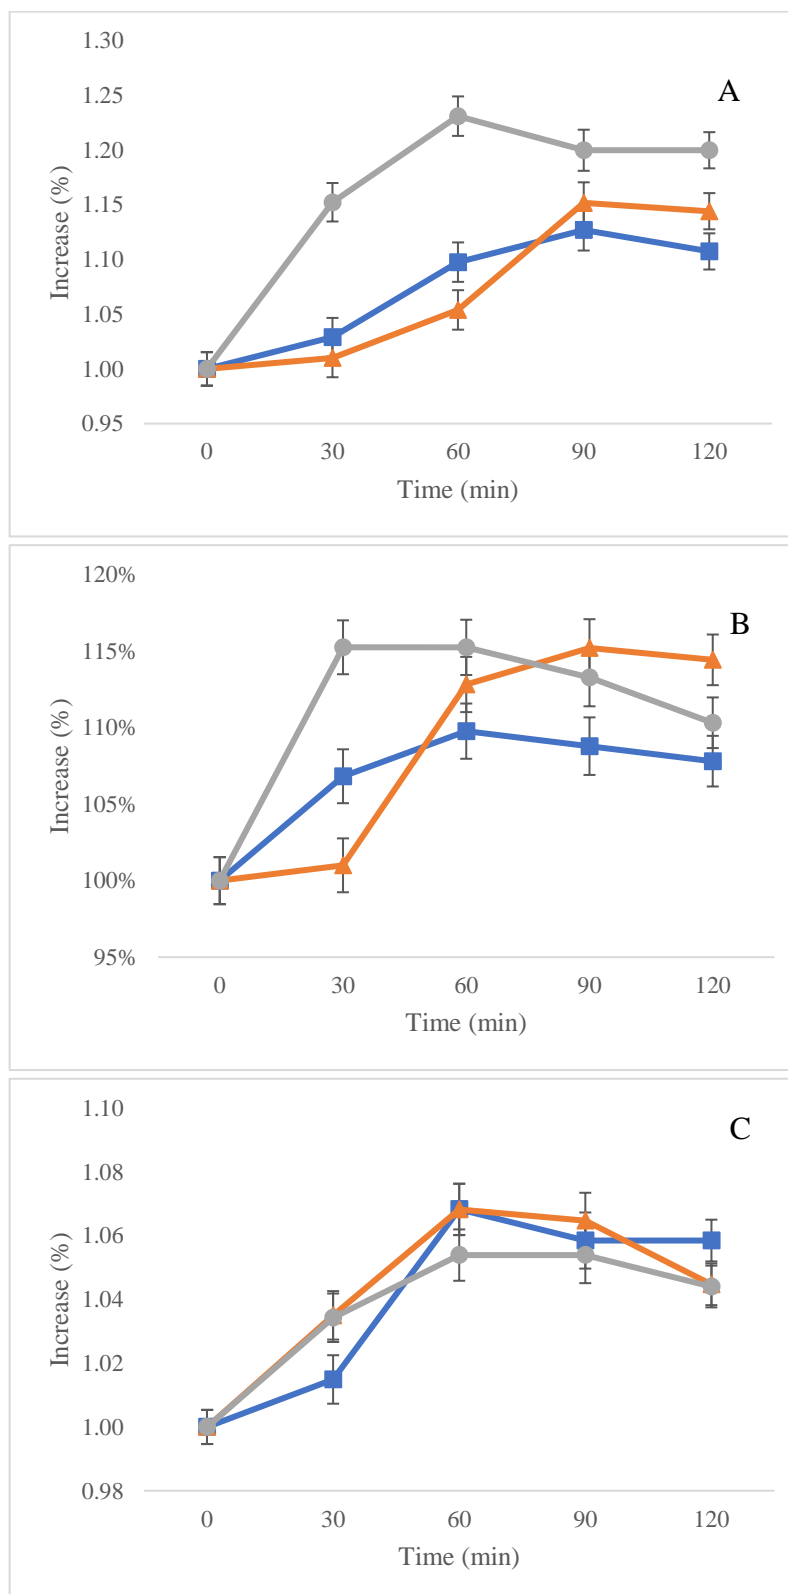

Figure S3. Effect of incubation time on juice enrichment with respect to reducing sugar content (■) clarity (▲) and yield (●) of (a) strawberry, (b) blueberry and (c) raspberry
